# Supplementary material for: The effect of electrolyte composition on the electroreduction of CO2to CO on Ag based gas diffusion electrodes
Source: Royal Society of Chemistry journal article supplement (doi:10.1039/c5cp05665a), 2015-11-23
Supplement: c5cp05665a1.pdf [file c5cp05665a1.pdf]

Electronic Supplementary Information

for

**The effect of electrolyte composition on the electroreduction of CO<sub>2</sub> to CO on Ag based gas diffusion electrodes**

Sumit Verma,<sup>ab</sup> Xun Lu,<sup>a</sup> Sichao Ma,<sup>bc</sup> Richard I. Masel<sup>d</sup> and Paul J. A. Kenis<sup>\*ab</sup>

<sup>a.</sup> Department of Chemical & Biomolecular Engineering, University of Illinois at Urbana Champaign, 600 South Mathews Avenue, Urbana, Illinois 61801, USA.

<sup>b.</sup> International Institute for Carbon Neutral Energy Research (WPI-I2CNER), Kyushu University, 744 Motoooka, Nishi-ku, Fukuoka 819-0395, Japan.

<sup>c.</sup> Department of Chemistry, University of Illinois at Urbana-Champaign, 505 South Mathews Avenue, Urbana, IL 61801, USA.

<sup>d.</sup> Dioxide Materials, 3998 FAU Boulevard #300, Boca Raton, Florida 33431, USA.

\* Author to whom correspondence should be addressed. Email: [kenis@illinois.edu](mailto:kenis@illinois.edu)

Contents

| S.No | Title                                                                                                                                                 | Page |
|------|-------------------------------------------------------------------------------------------------------------------------------------------------------|------|
| I.   | pH measurements before and after the electroreduction of CO <sub>2</sub> to CO for different electrolytes at a cell potential of -2.25 V and -2.75 V. | S1   |
| II.  | Effect of Nafion on the electroreduction of CO <sub>2</sub> to CO on Ag based gas diffusion electrodes.                                               | S1   |
| III. | Electrochemical performance for mixtures of 2.5 M KCl with 0.5 M EMIM Cl, and 0.5 M 1:2 Choline Cl urea deep eutectic solvents (DES).                 | S2   |

**I. pH measurements before and after the electroreduction of CO<sub>2</sub> to CO for different electrolytes at a cell potential of -2.25 V and -2.75 V.**

**Table S1** Total current density ( $j_{\text{total}}$ ), cathode potential, initial, and final pH for different electrolytes at cell potentials of -2.25 V and -2.75 V.

| Electrolyte                             | Initial pH | Cell Potential = -2.25 V    |                                           |          | Cell Potential = -2.75 V    |                                           |          |
|-----------------------------------------|------------|-----------------------------|-------------------------------------------|----------|-----------------------------|-------------------------------------------|----------|
|                                         |            | Cathode Potential (vs. RHE) | $j_{\text{total}}$ (mA cm <sup>-2</sup> ) | Final pH | Cathode Potential (vs. RHE) | $j_{\text{total}}$ (mA cm <sup>-2</sup> ) | Final pH |
| 2.0 M KCl                               | 6.54       | -0.60                       | 1.7                                       | 6.66     | -0.99                       | 51.4                                      | 10.21    |
| 2.0 M KHCO <sub>3</sub>                 | 8.59       | -0.60                       | 7.3                                       | 8.60     | -0.87                       | 55.5                                      | 8.81     |
| 2.0 M KOH                               | 13.77      | -0.66                       | 105.4                                     | 13.72    | -0.98                       | 269.3                                     | 13.61    |
| 1.5 M KCl + 0.5 M (1:2) Choline Cl Urea | 6.52       | -0.55                       | 0.9                                       | 6.64     | -0.87                       | 22.1                                      | 10.02    |

**II. Effect of Nafion on the electroreduction of CO<sub>2</sub> to CO on Ag based gas diffusion electrodes.**

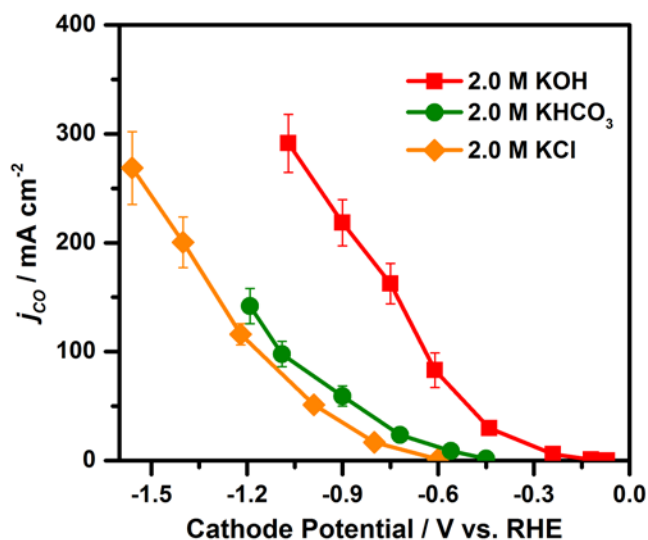

**Fig. S1** Partial current density for CO using different electrolytes when using Ag nanoparticles without Nafion as the cathode catalyst and IrO<sub>2</sub> as the anode catalyst.

II. Electrochemical performance for mixtures of 2.5 M KCl with 0.5 M EMIM Cl, and 0.5 M 1:2 Choline Cl urea deep eutectic solvents (DES).

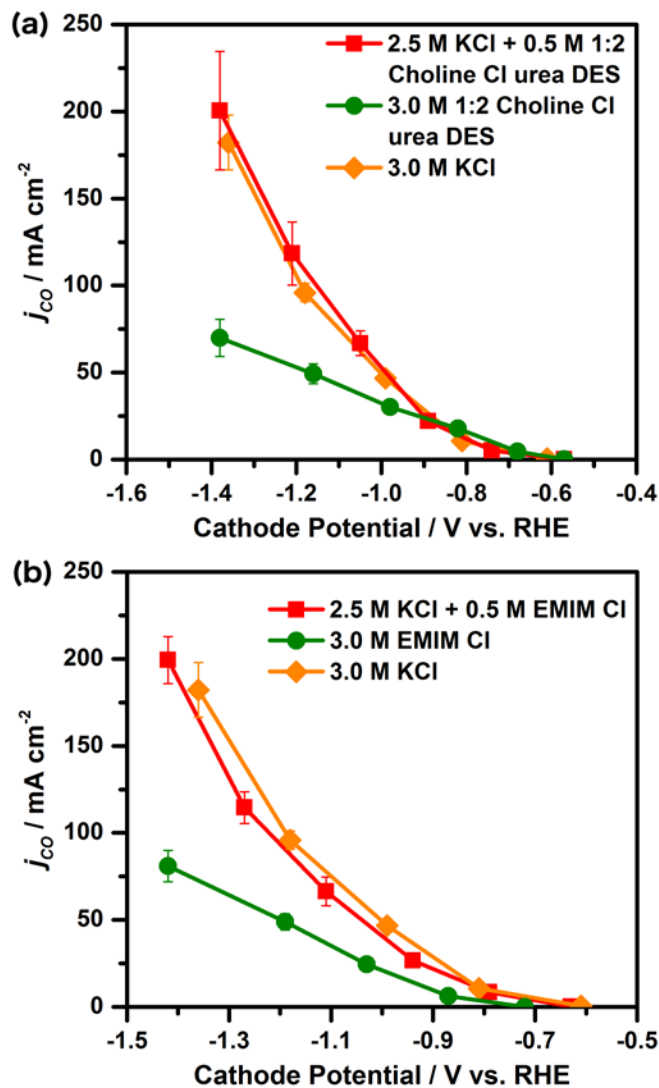

**Fig. S2** Partial current density for CO using different electrolytes, specifically combinations of KCl with (a) 1:2 Choline Cl urea DES and with (b) EMIM Cl when using Ag nanoparticles as the cathode catalyst and IrO<sub>2</sub> as the anode catalyst.
